# Supplementary material for: Exploring Polypharmacy Burden Among elderly patients with chronic diseases in Chinese community: a cross-sectional study
Source: Research Square preprint supplement (doi:10.21203/rs.3.rs-198514/v1), 2021-02-18
Supplement: Supplementary file 1 [file 52b9936e7198172e636e95e5.pdf]

**TABLE1** Demographic characteristics of participants (n=430)

| Characteristic                      | n(%)      | score ( $\bar{x}\pm s$ ) | <i>t</i> / <i>F</i> value | <i>P</i> |
|-------------------------------------|-----------|--------------------------|---------------------------|----------|
| Age(years)                          |           |                          |                           |          |
| 60~                                 | 116(27.0) | 113.53±9.39              | 7.624 <sup>b</sup>        | 0.001    |
| 70~                                 | 216(50.2) | 114.34±11.80             |                           |          |
| 80~                                 | 98(22.8)  | 109.13±11.39             |                           |          |
| Gender                              |           |                          |                           |          |
| Male                                | 164(38.1) | 112.17±11.08             | -1.094 <sup>a</sup>       | 0.274    |
| Female                              | 266(61.7) | 113.39±11.38             |                           |          |
| Education level                     |           |                          |                           |          |
| Primary school or less              | 69(16.0)  | 116.62±10.29             | 12.168 <sup>b</sup>       | <0.001   |
| Middle school                       | 166(38.5) | 115.28±10.35             |                           |          |
| High school                         | 136(31.6) | 110.45±11.02             |                           |          |
| College or above                    | 59(13.7)  | 107.71±12.41             |                           |          |
| Marital status                      |           |                          |                           |          |
| Unmarried                           | 3(0.7)    | 118.67±7.51              | 1.136 <sup>b</sup>        | 0.334    |
| Married                             | 313(72.6) | 112.99±11.01             |                           |          |
| Divorce                             | 10(2.3)   | 107.20±11.60             |                           |          |
| Widowed                             | 104(24.1) | 113.13±12.02             |                           |          |
| Primary caregiver                   |           |                          |                           |          |
| Spouse                              | 138(32.0) | 112.12±8.84              | 2.984 <sup>b</sup>        | 0.019    |
| Child                               | 154(35.7) | 111.53±10.21             |                           |          |
| Nursing workers                     | 39(9.0)   | 114.67±15.15             |                           |          |
| No                                  | 86(20.0)  | 116.22±13.63             |                           |          |
| Other                               | 13(3.0)   | 111.00±12.28             |                           |          |
| Income per month(RMB)               |           |                          |                           |          |
| <2000                               | 83(19.3)  | 116.93±10.13             | 17.315 <sup>b</sup>       | <0.001   |
| 2000~                               | 149(34.6) | 115.83±11.20             |                           |          |
| 3000~                               | 135(31.3) | 110.01±10.06             |                           |          |
| >4000                               | 63(14.6)  | 107.03±11.37             |                           |          |
| Living status                       |           |                          |                           |          |
| Lives with spouse only              | 233(54.1) | 113.31±10.23             | 0.199 <sup>b</sup>        | 0.897    |
| Lives with children only            | 84(19.5)  | 112.58±12.46             |                           |          |
| Lives with both spouse and children | 70(16.2)  | 112.33±11.86             |                           |          |
| Lives alone                         | 43(10.0)  | 112.51±13.38             |                           |          |
| Health conditions(diagnoses)        |           |                          |                           |          |
| High blood pressure                 | 362(84.0) | 112.95±11.37             | -0.095                    | 0.924    |
| Stroke                              | 199(46.2) | 113.20±11.22             | -0.466                    | 0.641    |
| Diabetes                            | 255(59.2) | 113.73±11.22             | -1.794                    | 0.074    |

|                                          |             |              |                     |        |
|------------------------------------------|-------------|--------------|---------------------|--------|
| Hyperlipidemia                           | 281(65.2)   | 111.99±19.70 | 2.385               | 0.022  |
| Coronary heart disease                   | 254(58.9)   | 112.30±10.74 | 1.383               | 0.176  |
| Chronic obstructive<br>pulmonary disease | 134(31.1)   | 115.22±10.72 | -2.867              | 0.004  |
| <b>Number of medicines</b>               |             |              |                     |        |
| 5~10                                     | 174 (40.4)) | 109.71±10.31 | 25.901 <sup>b</sup> | <0.001 |
| 11~15                                    | 203 (47.1)) | 113.41±11.15 |                     |        |
| >15                                      | 53 (12.3)   | 121.66±9.86  |                     |        |
| <b>Frequency of medicines</b>            |             |              |                     |        |
| Once per day                             | 49(11.4)    | 105.16±9.97  | 16.367 <sup>b</sup> | <0.001 |
| Twice per day                            | 91(21.1)    | 110.36±11.49 |                     |        |
| Three per day                            | 224(52.0)   | 114.16±10.71 |                     |        |
| More than three times per day            | 66(15.3)    | 118.06±10.09 |                     |        |
| <b>Monthly self-paid medication(RMB)</b> |             |              |                     |        |
| <100                                     | 44(10.2)    | 104.20±9.69  | 13.573 <sup>b</sup> | <0.001 |
| 100~                                     | 98(22.7)    | 110.28±9.93  |                     |        |
| 300~                                     | 128(29.7)   | 113.64±11.57 |                     |        |
| 500~                                     | 129(29.9)   | 115.89±10.12 |                     |        |
| 800~                                     | 31(7.2)     | 118.42±12.37 |                     |        |

Tips:a represents T value; b represents F value

**TABLE 2** Responses to individual statements in the C-LMQ-3 and 8 domains score (n=430)

| Statements /domains                                                                                                                         | Agree/<br>Strongly<br>Agree<br>N (%) | Neutral<br>opinion<br>N (%) | Disagree/<br>Strongly<br>Disagree<br>N (%) |
|---------------------------------------------------------------------------------------------------------------------------------------------|--------------------------------------|-----------------------------|--------------------------------------------|
| <b>Practical difficulties (6 items; Mean (SD)=17.2 (2.5))</b>                                                                               |                                      |                             |                                            |
| I find getting my prescriptions from the doctor difficult                                                                                   | 113 (26.2)                           | 134(31.2)                   | 183(42.6)                                  |
| I am comfortable with the times I should take my medicines                                                                                  | 262(60.9)                            | 93(21.6)                    | 75(17.5)                                   |
| I am concerned that I may forget to take my medicines                                                                                       | 207(48.1)                            | 132(30.7)                   | 91(21.2)                                   |
| It is easy to keep my medicines routine                                                                                                     | 250(58.1)                            | 123(28.6)                   | 57(13.3)                                   |
| I find using my medicines difficult (eg: taking the medication from the package, keeping in mind the precautions for medication use, etc.). | 216(50.2)                            | 71(16.5)                    | 143(33.3)                                  |
| I have to put a lot of planning and thought into taking my medicines                                                                        | 107(24.9)                            | 163(37.9)                   | 160(37.2)                                  |
| <b>lack of effectiveness (5 items; Mean (SD)=13.3 (2.6))</b>                                                                                |                                      |                             |                                            |
| My medicines prevent my condition getting worse                                                                                             | 219(50.9)                            | 160(37.2)                   | 51(11.9)                                   |
| My medicines live up to my expectations                                                                                                     | 208(48.4)                            | 164(38.1)                   | 58(13.5)                                   |
| My medicines allow me to live my life as I want to                                                                                          | 205(47.7)                            | 102(23.7)                   | 123(18.6)                                  |
| My medicines are working                                                                                                                    | 232(54.0)                            | 114(26.5)                   | 84(19.5)                                   |
| The side effects are worth it for the benefits I get from my medicines                                                                      | 181(42.1)                            | 159(37.0)                   | 90(20.9)                                   |
| <b>Cost-related burden (3 items; Mean (SD)=9.4 (2.3))</b>                                                                                   |                                      |                             |                                            |
| I worry about paying for my medicines                                                                                                       | 229(53.3)                            | 91(21.1)                    | 110(25.6)                                  |
| I sometimes have to choose between buying basic essentials or medicines                                                                     | 103(24.0)                            | 143(33.3)                   | 184(42.8)                                  |
| I have to pay more than I can afford for my medicines.                                                                                      | 167(38.8)                            | 161(37.4)                   | 102(23.8)                                  |
| <b>Communication/relationships with HCPs (5 items; Mean (SD)=13.6 (3.4))</b>                                                                |                                      |                             |                                            |
| I trust the judgement of my doctor(s) in choosing medicines for me.                                                                         | 293(68.1)                            | 49(11.4)                    | 88(20.5)                                   |
| My doctor(s) listen to my opinions about my medicines                                                                                       | 218(50.7)                            | 99(23.0)                    | 113(26.3)                                  |
| My doctor takes my concerns about side effects seriously.                                                                                   | 164(38.1)                            | 145(33.7)                   | 121(28.1)                                  |
| I get enough information about my medicines from my doctor(s)                                                                               | 256(59.5)                            | 90(21.0)                    | 84(19.5)                                   |
| The health professionals providing my care know enough about me and my medicines                                                            | 159(37.0)                            | 160(37.2)                   | 111(25.8)                                  |
| <b>Concerns about medicine use (7 items; Mean (SD)=21.8 (4.1))</b>                                                                          |                                      |                             |                                            |
| I worry that I have to take several medicines at the same time                                                                              | 213(49.5)                            | 73(17.0)                    | 144(33.5)                                  |
| I would like more say in the brands of medicines I use                                                                                      | 203(47.2)                            | 70(16.3)                    | 157(36.5)                                  |
| I feel I need more information about my medicines                                                                                           | 204(47.4)                            | 138(32.1)                   | 88(20.5)                                   |
| I am concerned about possible damaging long-term effects of taking medicines                                                                | 194(45.1)                            | 50(11.6)                    | 186(43.3)                                  |
| I am concerned that I am too reliant on my medicines                                                                                        | 178(41.4)                            | 129(30.0)                   | 123(28.6)                                  |
| I am concerned that my medicines interact with eating habits (other food, alcohol, drinks, etc.).                                           | 101(23.5)                            | 129(30.0)                   | 200(46.5)                                  |
| I worry that my medicines may interact with each other                                                                                      | 150(34.9)                            | 171(39.8)                   | 109(25.3)                                  |

|                                                                                            |           |           |           |
|--------------------------------------------------------------------------------------------|-----------|-----------|-----------|
| <b>Side-effect-burden (4 items; Mean (SD)=11.9 (1.9))</b>                                  |           |           |           |
| The side effects I get are sometimes worse than the problems for which I take my medicines | 205(47.7) | 152(35.3) | 73(17.0)  |
| The side effects that I get from my medicines interfere with my day to day life            | 143(33.3) | 149(34.7) | 138(32.1) |
| The side effects I get from my medicines are bothersome                                    | 147(34.2) | 173(40.2) | 110(25.6) |
| The side effects I get from my medicines adversely affect my wellbeing                     | 70(16.3)  | 106(24.6) | 254(59.1) |
| <b>Interference to day-to-day life (6 items; Mean (SD)=17.4 (2.6))</b>                     |           |           |           |
| My medicines interfere with my social or leisure activities                                | 109(25.3) | 256(59.6) | 65(15.1)  |
| Taking medicines affects my going out (walking, Cycling, driving, etc.)                    | 81(18.8)  | 159(37.0) | 190(44.2) |
| My medicines interfere with my social relationships with (family, friends, colleagues)     | 64(14.9)  | 132(30.7) | 234(54.4) |
| Taking medicines causes problems with daily tasks                                          | 135(31.4) | 218(50.7) | 77(17.9)  |
| My medicines interfere with my sexual life                                                 | 79(18.4)  | 135(31.4) | 216(50.2) |
| My life revolves around using medicines                                                    | 170(39.5) | 193(44.9) | 67(15.6)  |
| <b>Autonomy/control (3 items; Mean (SD)=8.5 (2.2))</b>                                     |           |           |           |
| I can vary the dose of the medicines I take                                                | 231(53.7) | 133(30.9) | 66(15.4)  |
| I can choose whether or not to take my medicines                                           | 181(42.1) | 100(23.3) | 149(43.6) |
| I can vary the times I take my medicines                                                   | 154(35.8) | 147(34.2) | 129(30.0) |

**TABLE3** The top 10 items with the highest scores in C-LMQ-3.

| Item                                                                                                                                           | score ( $\bar{x} \pm s$ ) | sort |
|------------------------------------------------------------------------------------------------------------------------------------------------|---------------------------|------|
| 3. I worry about paying for my medicines                                                                                                       | 3.37 $\pm$ 1.05           | 1    |
| 7. I feel I need more information about my medicines                                                                                           | 3.37 $\pm$ 0.94           | 2    |
| 19. The side effects I get are sometimes worse than the problems for which I take my medicines                                                 | 3.33 $\pm$ 0.78           | 3    |
| 8. I am concerned that I may forget to take my medicines                                                                                       | 3.31 $\pm$ 0.92           | 4    |
| 39. My life revolves around using medicines                                                                                                    | 3.28 $\pm$ 0.78           | 5    |
| 4. I worry that I have to take several medicines at the same time                                                                              | 3.24 $\pm$ 1.07           | 6    |
| 31. I have to pay more than I can afford for my medicines.                                                                                     | 3.22 $\pm$ 0.94           | 7    |
| 27. I find using my medicines difficult (eg: taking the medication from the package, keeping in mind the precautions for medication use, etc). | 3.20 $\pm$ 0.95           | 8    |
| 6. I would like more say in the brands of medicines I use                                                                                      | 3.18 $\pm$ 1.24           | 9    |
| 34. My medicines interfere with my social or leisure activities                                                                                | 3.16 $\pm$ 0.76           | 10   |

**TABLE4** Multivariable stepwise linear model analysis for the association with the multiple medicationburden among elderly patients with chronic diseases (n= 430)<sup>a</sup>

| <b>Variables((Reference)</b>                  | <b><math>\beta</math></b> | <b><i>SE</i></b> | <b><i>t</i></b> | <b><i>P</i>value</b> |
|-----------------------------------------------|---------------------------|------------------|-----------------|----------------------|
| Age(per 10years)                              | -2.044                    | 0.637            | -3.211          | 0.001                |
| Education(College or above)                   | -1.960                    | 0.534            | -3.671          | <0.001               |
| Income per month(RMB>4000)                    | -1.799                    | 0.513            | -3.508          | <0.001               |
| Types of medicines(>11)                       | 3.728                     | 0.685            | 5.441           | <0.001               |
| Monthly self-paid medication(RMB>800)         | 2.125                     | 0.423            | 5.022           | <0.001               |
| Frequency of medicines( $\geq 3$ times daily) | 3.213                     | 0.532            | 6.043           | <0.001               |
| Constant                                      | 101.03                    | 4.108            | 24.596          | 0.000                |

 $R^2 = 0.345$ , Adj  $R^2 = 0.329$ ;  $F = 10.31$ ,  $P < 0.0001$ 

<sup>a</sup>Adjustment for age (60-69,70-79, $\geq 80$ ), education level (Primary school or less, Middle school, High school, College or above), Income per month(RMB) (<2000,2000~,3000~,>4000), Types of medicines (5~10,11~15,>15), Frequency of medicines (Once per day, Twice per day, Three per day, More than three times per day), Monthly self-paid medication(RMB)(100,100~,300~,500~,800~)and other variables in the models.
